# 1 **Proprioceptive Deficits in Inactive Older Adults are not Reflected in** 2 **Discrete Reaching Performance**

3 Authors:

4 **Nick M. Kitchen<sup>1,2\*</sup>, R Chris Miall<sup>1</sup>**

5 <sup>1</sup> School of Psychology, University of Birmingham, Birmingham, UK.

6 <sup>2</sup> Dept. of Speech & Hearing Science, University of Washington, Seattle, WA, USA.

7

8 **\* Address for correspondence:**

9 Nick Kitchen, Dept. of Speech & Hearing Science, 1417 NE 42nd St, Seattle, WA, 98105

10 Email: [nickkitchen1@gmail.com](mailto:nickkitchen1@gmail.com)

11

12 Nick M. Kitchen ORCID: 0000-0002-8815-5415

13 R Chris Miall ORCID: 0000-0003-3002-1251

14 **Key Words**

15 Proprioception, Ageing, Reaching, Sensorimotor Control

16

17 **Acknowledgements**

18 This work was funded by the MRC-ARUK Centre for Musculoskeletal Ageing Research  
19 (CMAR) and by the Wellcome Grant WT087554.

20

## 21 **Abstract**

22 During normal healthy ageing there is a decline in the ability to control simple movements,  
23 characterised by increased reaction times, movement durations and variability. There is also  
24 growing evidence of age-related proprioceptive loss which may contribute to these  
25 impairments. However this relationship has not been studied in detail for the upper limb.  
26 We recruited 20 younger adults (YAs) and 31 older adults (OAs) who each performed 2 tasks  
27 on a 2D robotic manipulandum. The first assessed dynamic proprioceptive acuity using  
28 active, multi-joint movements towards visually presented targets, with movement  
29 constrained by the robot to a predefined path. Participants made perceptual judgements of  
30 the lateral position of the unseen arm. The second was a rapid motor task which required  
31 fast, accurate movements to the same targets in the absence of hand position visual  
32 feedback, and without constraint by the robot. We predicted that the variable  
33 proprioceptive error (uncertainty range) from Task 1 would be increased in physically  
34 inactive OAs and would predict increased movement variability in Task 2. Instead we found  
35 that physically inactive OAs had larger systematic proprioceptive errors (bias). Neither  
36 proprioceptive acuity nor bias was related to motor performance in either age group. We  
37 suggest that previously reported estimates of proprioceptive decline with ageing may be  
38 exaggerated by task demands and that the extent of these deficits is unrelated to discrete,  
39 ballistic movement control. The relationship of dynamic proprioceptive acuity with  
40 movement control in tasks which emphasise online proprioceptive feedback for  
41 performance is still unclear and warrants further investigation.

42

## 43 **Introduction**

44 As we get older there is a general decline in motor system physiology which affects the  
45 ability to perform simple movements. This includes degradation of musculature through loss  
46 and remodelling of muscle motor units (Lexell, 1995; Morley, Baumgartner, Roubenoff,  
47 Mayer, & Nair, 2001; Slack, Hopkins, & Williams, 1979), as well as degeneration of efferent  
48 peripheral nerves and the neuromuscular junction (Ceballos, Cuadras, Verdu, & Navarro,  
49 1999; Jacobs & Love, 1985; Valdez et al., 2010) which disrupts transmission of motor  
50 commands and impairs the ability to perform movements as intended. This is characterised  
51 in advanced age by increased movement duration (Contreras-Vidal, Teulings, & Stelmach,  
52 1998; Helsen et al., 2016; Ketcham, Seidler, Van Gemmert, & Stelmach, 2002), as well as  
53 increased spatial (Darling, Cooke, & Brown, 1989; Seidler, Alberts, & Stelmach, 2002) and  
54 temporal (Contreras-Vidal et al., 1998; Yan, Thomas, Stelmach, & Thomas, 2000) variations  
55 during a range of different movement tasks. Interestingly, this is often coupled with a  
56 maintenance of endpoint accuracy (Helsen et al., 2016; Lee, Fradet, Ketcham, & Dounskaia,  
57 2007; Seidler-Dobrin & Stelmach, 1998) which is thought to be achieved through increased  
58 movement duration, reaction time and by online corrective mechanisms which are  
59 frequently observed in this population (Helsen et al., 2016; Ketcham et al., 2002).

60 In addition to motor physiology, loss of proprioception has also been suggested as a  
61 contributing factor to the presentation of these age-related motor deficits. Specifically,  
62 there is growing evidence to show decline of this sensation through a range of different  
63 measurement techniques (see Goble, Coxon, Wenderoth, Van Impe, & Swinnen, 2009 for  
64 review), including limb position matching to both passively (Adamo, Alexander, & Brown,

65 2009; Adamo, Martin, & Brown, 2007; Helsen et al., 2016; Herter, Scott, & Dukelow, 2014;  
66 Lei & Wang, 2018) and actively (Schaap, Gonzales, Janssen, & Brown, 2015) derived  
67 reference positions. Age-dependent deficits have also been reported in thresholds for  
68 detecting passive joint displacement (Helsen et al., 2016; Wright, Adamo, & Brown, 2011)  
69 and in two alternative forced-choice paradigms involving position estimates of active, multi-  
70 joint movements (Cressman, Salomonczyk, & Henriques, 2010). This age-related loss of  
71 acuity appears to be amplified by physical inactivity (Adamo et al., 2009; Helsen et al., 2016;  
72 Wright et al., 2011) and in the lower limb, these deficits have been associated with  
73 impairments in functional motor measures including balance, posture, mobility and  
74 incidence of falls (Hurley, Rees, & Newham, 1998; Lord, Clark, & Webster, 1991; Sorock &  
75 Labiner, 1992; Wingert, Welder, & Foo, 2014). In spite of these reports, the extent to which  
76 proprioceptive loss contributes to age-related movement deficits of the upper limb is still  
77 poorly understood.

78 Recently, Helsen et al. (2016) attempted to address this by associating measures from two  
79 passive proprioceptive assessment techniques with participants' performance in rapid,  
80 target-based wrist movements. Similar to previous reports, they found physically inactive  
81 older adults had prolonged detection thresholds for passive wrist displacement and  
82 increased matching errors to passively defined reference positions, indicating loss of  
83 proprioceptive acuity. But despite reporting stereotypical age-related motor kinematic  
84 impairments, the authors did not find an association between proprioception and motor  
85 performance. From this, they concluded that proprioceptive impairments can be overcome  
86 in ageing by greater reliance on predictive, feed-forward mechanisms of motor control.

87 However, since limb position sense can be directionally modulated by corollary discharge  
88 (Smith, Crawford, Proske, Taylor, & Gandevia, 2009), the proprioception experienced during  
89 active, voluntary movement is likely different to that of passive displacements. Indeed,  
90 active movement to participant-defined reference positions has been shown to reduce  
91 position matching errors compared to traditional, passive methods in both younger  
92 (Erickson & Karduna, 2012; Lönn, Crenshaw, Djupsjöbacka, Pedersen, & Johansson, 2000)  
93 and older (Langan, 2014) adults, demonstrating how sense of effort affects performance on  
94 these tasks. Hence, the null relationship of upper limb proprioception and motor control  
95 reported by Helsen et al. (2016) may actually reflect the difference in proprioceptive  
96 perception between passive and active movement. Furthermore, impairments in working  
97 memory and attention have been shown to confound position matching errors in ageing  
98 (Boisgontier, Olivier, Chenu, & Nougier, 2012; Goble, Mousigian, & Brown, 2012), which  
99 further advocates the use of alternative proprioceptive acuity assessments for investigating  
100 an association with voluntary movement control in this population.

101 Yet reports directly comparing age groups on active movement-based proprioceptive tasks  
102 which limit dependence on working memory are scarce. Cressman et al. (2010) measured  
103 shifts in sensed limb position associated with adaptation of reaches to a visual rotation in a  
104 group of older and younger adults. Sensed limb position was assessed by asking participants  
105 to make active, multi-joint reaching movements constrained to a tight, pre-defined  
106 trajectory, before making instantaneous judgements of their unseen limb relative to a  
107 visually presented reference position. These two-alternative forced choice responses were  
108 then gathered and used to estimate both systematic (bias) and variable (uncertainty range)

109 proprioceptive errors; only the latter showed age-related increase, with marginal statistical  
110 significance. Variants of this task have been reported elsewhere (Cressman & Henriques,  
111 2009; Ostry, Darainy, Mattar, Wong, & Gribble, 2010), but this was the first report of its use  
112 with an ageing population. Critically, since this type of task reduces dependence on working  
113 memory and utilizes active movements, it may be more suited for the investigation of age-  
114 related proprioceptive loss and voluntary movement control. Moreover, if it is indeed the  
115 case that proprioceptive uncertainty increases with ageing, then this elevated sensory noise  
116 could make the sensory consequences of motor commands unpredictable (Miall & Wolpert,  
117 1996) and thus lead to more variable movement characteristics, which are frequently  
118 reported for the older adult population (Darling et al., 1989; Ketcham et al., 2002; Seidler et  
119 al., 2002). As such, the proprioceptive uncertainty estimate derived from this type of task  
120 makes for a compelling predictor of motor performance in the ageing population.

121 The aim of this experiment was therefore to assess, in groups of older and younger adults,  
122 the extent to which dynamic, multi-joint proprioceptive acuity of the upper limb could  
123 predict performance on a fast, targeted reaching movement task. We predicted that  
124 physically inactive older adults would exhibit larger proprioceptive uncertainty ranges and  
125 that this would predict greater variation in motor performance. Conversely, since a  
126 systematic perceptual error (assessed as proprioceptive bias), may be easier to predict and  
127 account for during motor control, we predicted bias would be unrelated to motor  
128 performance for either age group.

129

## 130 **Methods**

### 131 **Participants**

132 Thirty one older adults (OAs) aged 65 years or older (11 male,  $71.2 \pm 4.5$  yrs), and 20  
133 younger adults (YAs) aged 18-25 years (11 male,  $20.4 \pm 2.0$  yrs) participated in the  
134 experiment after giving informed consent; the University of Birmingham ethics panel  
135 approved the study. All participants were right-hand dominant as defined by a laterality  
136 quotient of 30 or higher on the 10-item Edinburgh Handedness Inventory (Oldfield, 1971).  
137 Participants were excluded if they had any history of neurological illness, or carpal tunnel  
138 syndrome, arthritis or similar movement pains or limitations in the arm, wrist or fingers. OAs  
139 also completed the Montreal Cognitive Assessment (MoCA) and were only included in the  
140 analysis if they scored 26 or above out of 30, which is considered to indicate normal  
141 cognitive functioning (Nasreddine et al., 2005).

### 142 **Experimental Set-Up**

143 Participants sat in front of a 2D-planar robotic manipulandum (vBOT; Howard, Ingram, &  
144 Wolpert, 2009) which provided a low-inertia, low-friction means of recording simple  
145 reaching movements in a 40x64cm workspace (Figure 1A). With their foreheads resting  
146 against a padded metal frame approximately 10cm behind the edge of the workspace,  
147 participants grasped the manipulandum handle with their right hand and were asked to look  
148 down onto a mirrored surface. This blocked direct view of the hand and arm and reflected  
149 images from a large, horizontally mounted monitor display. Target locations and visual  
150 feedback of hand position were presented in this way, with the cursor (when displayed)

151 spatially coincident with the centre of the vBOT handle. Recordings of the vBOT handle  
152 position were sampled at 1kHz with any applied forces updated at the same rate. In both  
153 the dynamic proprioceptive and rapid motor reaching tasks, participants made reaching  
154 movements from a white 1cm radius start position located 8cm into the workspace  
155 (approximately 28cm from the participant's torso). Participants made reaching movements  
156 to one of three positions, shown by a 1cm radius grey target, which were located 20cm from  
157 the start position at 30°, 90° and 150° elevation (Figure 1B). When made available, hand  
158 position feedback was provided on a real-time basis by a 0.5cm radius white cursor that was  
159 always spatially congruent with the vBOT handle. In all cases targets were presented in a  
160 pseudorandomised order.

## 161 Experimental Design

162 All participants performed the dynamic proprioceptive task first. Hence there was no  
163 possibility for the feedback associated with the rapid motor reaching task to alter or  
164 improve proprioceptive acuity to the same spatially located targets.

## 165 Task 1: Dynamic Proprioception

### 166 Procedure

167 Participants made reaching movements towards 1 of the 3 targets with visual feedback of  
168 hand position occluded throughout, and target position occluded after the initial 5cm  
169 outward movement (see Figure 1C). These movements were constrained to a pre-defined  
170 minimum jerk path using stiff virtual walls (see Ostry et al. 2010) that steered the hand



171 laterally away from the target (stiffness: 2000 N/m with 10 N.m/s damping imposed by  
172 vBOT motors; no force applied in the forward direction). At the end of the movement, the  
173 hand was held at the final deviated position and a white circle and square appeared at a  
174 constant position clockwise (CW) or counter-clockwise (CCW) of the target, respectively. The  
175 participant then verbally indicated the symbol (“Square” or “Circle”) which represented the  
176 side of the target they felt they had been guided to. With visual feedback of hand position  
177 still occluded, participants were actively guided back to the start position by a spring force  
178 (500 N/m, 1 N.m/s damping), where they remained until a new target appeared and the  
179 next trial began. The size of the lateral deviation was manipulated across trials by 2  
180 randomly interleaved PEST sequences (see below).

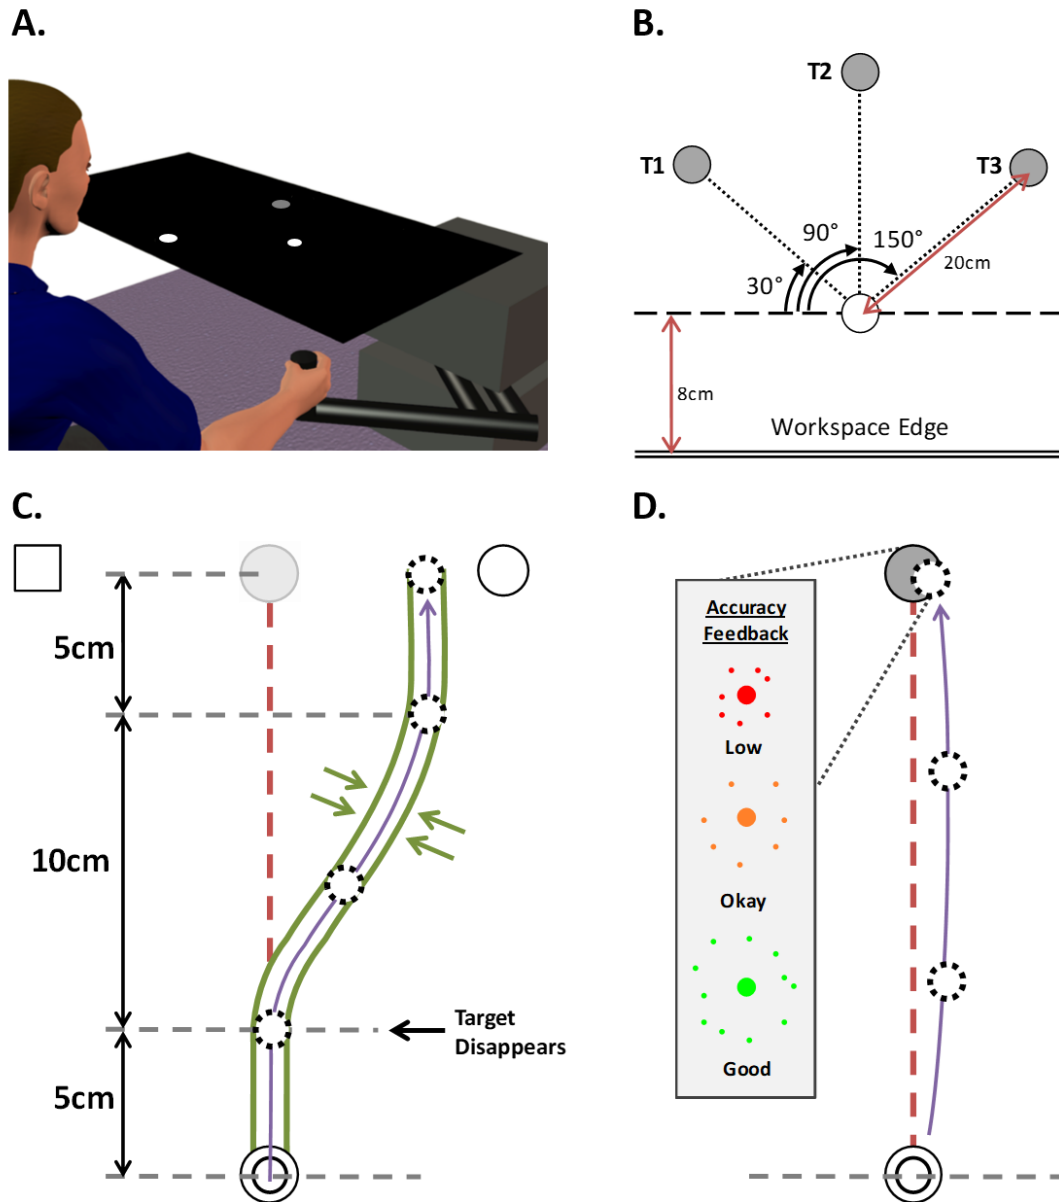

**Figure 1 – A.** Example set-up of vBOT. LCD display (not shown) projects image onto mirrored surface to give visual feedback of hand location on robot handle. Mirror occludes any direct vision of the reaching arm **B.** Workspace locations and relative distances of the 3 targets (T1-T3) used in both the dynamic proprioception and rapid motor tasks **C.** Illustration of minimum jerk channel for the dynamic proprioception task. At termination, a circle and square are displayed to prompt a verbal response (“Circle” would be correct in this example). Target is visible for first 5cm before it disappears for remainder of trial, hand position cursor remains occluded for all channel trials in a given block **D.** Illustration of rapid reaching task. Visual feedback of hand position was occluded once the cursor left the home position and remained so for the entire trial. Coloured feedback was provided at the target location on trial termination to indicate the endpoint accuracy of the movement. Both the experimental tasks in **C.** and **D.** are performed at target T2 (T1 and T3 not shown)

182 PEST Sequences

183 The size and direction of the lateral deviation imposed by the virtual channels was dictated  
184 by two randomly interleaved PEST sequences (Taylor & Creelman, 1967) spanning across all  
185 3 targets, with one starting each from the CCW (“Square”) and CW (“Circle”) sides of the  
186 target. In each block the initial deviation magnitude began at 3cm ( $\pm 0.05$ cm added noise)  
187 with an initial step size of  $\pm 1$ cm, with 3 repeats (1 per target) at each “level” – the  
188 magnitude of the deviation. The deviation magnitude would increase or decrease depending  
189 on the cumulative accuracy of the 3 verbal responses per level. If participants made 2 or  
190 more correct responses, they would be deemed successful at that level and the deviation  
191 magnitude would reduce. However, if they scored 1 or fewer correct responses, the  
192 deviation magnitude would increase. Whenever the sequence reversed, the new step size  
193 was half of the previous one i.e. from 1cm to 0.5cm at the first reversal.

194 Outcome Measures and Analysis

195 The participant’s verbal responses were converted to binary values (“Circle” = 1, “Square” =  
196 0) for each target; on the few occasions where there were multiple responses at the same  
197 deviation level to the same target, we then calculated the proportional response. A logistic  
198 function was then fitted to the data using the Matlab glmfit function to separately estimate  
199 the bias and uncertainly range of the psychometric response function. The bias represents  
200 the systematic or constant error in perception of hand position corresponding to the inverse  
201 of the 50<sup>th</sup> percentile of the logistic function. Thus positive bias represents perception of  
202 hand position shifted towards the “Circle” (CW direction), and negative bias represents a

203 perceptual shift towards the “Square” (CCW direction). The uncertainty range is defined as  
204 the interval between the 25<sup>th</sup> and 75<sup>th</sup> percentile of the fitted logistic function and  
205 represents a variable error in perception of hand position. To diminish the effects of  
206 outlying responses, data points which had a Pearson residual value which was more than 2  
207 standard deviations away from the mean of the residuals were excluded from the analysis  
208 (this equated to roughly 4% of data).

209 Average movement speed was recorded for the portion of movement where the participant  
210 first reached 1cm from the start position to 1cm short of the final, deviated position. The  
211 mean orthogonal force imposed against the channel walls was also recorded in the middle  
212 of the final straight, 5cm portion of movement (16-19cm from the start; see Figure 1C). Both  
213 speed and lateral force were used as correlates for the bias to ensure that magnitude and  
214 direction of effort exerted against the channel wall was not influencing perceptual errors  
215 (Smith et al., 2009).

216 The dynamic proprioception task began with a short familiarisation block of 6 null-field and  
217 9 perceptual channel trials. Participants then performed 5 blocks of 6 null-field trials  
218 followed by 48 channel trials with the opportunity for short breaks between blocks. The  
219 PEST sequence reset at the start of each new block such that the entire task included 5 PEST  
220 “runs” and totalled 80 perceptual judgements per target. Null-field trials were performed to  
221 the same spatially located targets and coloured feedback (an “explosion” graphic) was  
222 provided at the target location to indicate either a target “hit” or “miss”. These trials were  
223 intended to reduce proprioceptive drift during prolonged periods of occluded vision and  
224 were not analysed.

## 225 Task 2: Rapid Motor Reaching

### 226 Procedure

227 Participants began each reaching trial by moving the visible hand position cursor to the start  
228 position. After a random wait time of between 2 and 3 seconds, one of the three targets  
229 appeared, and this was the participant's cue to move towards the target as quickly and as  
230 accurately as possible. As soon as the cursor was moved outside of the start position it  
231 disappeared so the participant had no visual feedback of hand position during the  
232 movement. Participants were instructed to stop at their final position; the trial was  
233 terminated once hand velocity fell under 4cm/s at which point an animated "explosion"  
234 appeared at the target whose size and colour was based on the distance between the  
235 terminal hand position and the target (Figure 1D). Once the animation had finished, the  
236 hand position cursor reappeared, the target disappeared, and the participant was actively  
237 guided back towards the start position for the next trial.

### 238 Outcome Measures and Analysis

239 Kinematic performance was quantified by calculating reaction time (RT), peak hand velocity  
240 (PV), movement time (MT) and time to peak velocity (TPV). Movement initiation and  
241 termination were defined as the points where hand velocity first exceeded and then fell  
242 below 4cm/sec respectively. RT was therefore defined as the duration of time between the  
243 target appearing (i.e. movement initiation cue) and movement initiation. Trials where RT  
244 was less than 0.1sec or greater than 1sec were excluded from analysis (roughly 2% data).

245 TPV was expressed as a percentage of total MT (time between movement initiation and  
246 termination) to examine the speed profile of the movement independently of its actual  
247 duration. Accuracy was quantified both by the absolute error (AE) at endpoint (the  
248 Euclidean distance from trial termination position to the target location) and by the lateral  
249 deviation at endpoint (LE). LE was calculated as the orthogonal distance from the linear path  
250 between start position and target, to endpoint and was included to improve the validity of  
251 the association with the proprioceptive measures, which also use an orthogonal deviation  
252 measure. Within participants variability in motor accuracy was assessed using the standard  
253 deviation of the accuracy measure across trials for each participant, separately for each  
254 target.

255 The rapid motor task was preceded by 9 practice trials (3 per target), with main task  
256 performance consisting of 3 blocks of 20 trials such that there were a total of 20 movements  
257 to each target.

## 258 Physical Activity Measures

### 259 Older Adults

260 After completing the experiment, OAs were given wrist-worn accelerometers (Philips  
261 Actiwatch 2) to wear for 5 days (120 hours), where “activity counts” were logged in 30  
262 second epochs. If an epoch had less than 40 counts it was deemed to be inactive  
263 (intermediate activity threshold defined by Philips Actiware software version 6.0.2).  
264 The sum of all counts in the surviving active epochs over the 5 days provided a physical  
265 activity (PA) metric for each older participant. The median value of the scores between

266 participants was then used as a threshold to define “Inactive” and “Active” sub-groups of  
267 OAs for further analysis (demographic details for these groups are detailed in the Results  
268 section).

### 269 Younger Adults

270 We were unable to use accelerometer data to sub-group the YA participants. Hence self-  
271 reported PA measures were recorded for YAs using the IPAQ-Short questionnaire (Craig et  
272 al., 2003), with participants scoring in the highest “Health Enhancing Physical Activity”  
273 category being excluded from participation, in order to decrease heterogeneity.

### 274 Working Memory

275 To test if working memory capacity influenced our proprioceptive measures, working  
276 memory was measured before participation in the experiment by using the backward digit  
277 span test, following previous reports of its use in proprioceptive ageing studies (Adamo et  
278 al., 2009; Goble et al., 2012). In this task, participants were required to memorise a  
279 sequence of random numbers (ranging 1-9; read out to them at a rate of approximately 1  
280 number per second), and then recite them in reverse order. The task began with two trials  
281 at a sequence length of 2. If participants could correctly recite the sequence on at least 1  
282 out of the 2 attempts at that sequence length level, the sequence length would increase by  
283 one. The task then incremented in this fashion until both attempted recitals were incorrect.  
284 The highest sequence length which the participant could correctly recite at least 1 out of the  
285 2 attempts was recorded as their verbal working memory score.

286

## 287 Statistical and Cross-Task Analysis

288 All data are presented as group means  $\pm$  standard deviation unless otherwise stated, with  
289 values greater than 2.5 standard deviations away from the group mean at each target  
290 removed as outliers (approximately 5% of data). The remaining data were analysed in  
291 separate 3 x 3 mixed-design ANOVAs, with a between subjects factor of Group (inactive  
292 OAs, active OAs and YAs) and repeated measure of Target (T1-T3). A Greenhouse-Geisser  
293 correction was used in all cases where the sphericity assumption was violated, and  
294 significance was assessed at the  $\alpha < .050$  level. Statistically significant ANOVA effects and  
295 interactions were followed up with post-hoc t-test pairwise comparisons, and assessed for  
296 significance using a False Discovery Rate (FDR) analysis (Benjamini & Hochberg, 1995). The  
297 FDR analysis makes use of observed  $p$ -values to calculate an adjusted critical  $\alpha$ -threshold,  
298 meaning it can be used in a range of different test statistics (Curran-Everett, 2000) as well as  
299 typically having higher power and being less conservative than other more commonly used  
300 methods, such as the Bonferroni correction (Benjamini & Hochberg, 1995). As such, it is  
301 gaining more popularity in the field of sensorimotor research (Boisgontier et al., 2014;  
302 Helsen et al., 2016). All  $p$ -values for multiple comparisons are therefore reported as  
303 uncorrected (Least Significant Difference) values but assessed at FDR adjusted  $\alpha$ -thresholds  
304 (noted as  $\alpha_{\text{FDR}}$ ). In situations where no comparisons are found to be significant, the smallest  
305 observed  $p$ -value ( $p_{\text{min}}$ ) and its associated critical significance threshold (still denoted as  
306  $\alpha_{\text{FDR}}$ ) is reported.

307 To assess the relationship between motor performance and proprioceptive acuity, a series  
308 of linear regression models were calculated. Since proprioceptive judgements were made



309 along an axis orthogonal to the start-target vector, we assume that if either measure was  
310 related to motor control this would be most apparent with motor errors along a similar  
311 orthogonal axis. Thus, average lateral error (LE) and within-subject variation of LE (LE Var)  
312 were chosen as the motor performance measures to include in the regression models.  
313 Specifically, we hypothesize that proprioceptive noise could predict motor accuracy  
314 variation and so used uncertainty range to predict LE Var. We then examined the  
315 association between systematic proprioceptive and motor errors by using bias to predict LE.  
316 PA level was used as an additional predictor in the models which allowed us to collapse data  
317 across the inactive and active OA groups. Separate regression models were calculated for  
318 each of the 2 proprioceptive-motor relationships of interest for both OAs and YAs  
319 separately, with an FDR-adjusted  $\alpha$ -threshold used to control for multiple tests.

## 320 **Results**

### 321 Physical Activity Grouping

322 The 31 OAs were divided into either a physically inactive or physically active sub-group  
323 according to a threshold median value of  $1.68 \times 10^6$  activity counts from the 5-day  
324 accelerometer data. This left 16 OAs in the inactive group ( $1.29 \pm .31 \times 10^6$  counts; 7 male,  
325  $72.9 \pm 5.1$  yrs) and 15 in the active group ( $1.96 \pm .26 \times 10^6$  counts; 4 male,  $69.3 \pm 2.7$  yrs).  
326 The inactive group were found to be significantly older than the active group ( $t[22.9] = 2.5, p$   
327  $= .019$ ); this difference is addressed directly as needed for cases where it could be deemed  
328 to have a confounding effect on pairwise comparisons.

329

330 Dynamic Proprioception Task

331 Proprioceptive Measures

332 A summary of the proprioceptive outcome measures can be seen in Figures 2A (bias) and 2B  
333 (uncertainty range). There was a significant effect of Group on bias ( $F[2, 47] = 4.1, p = .023,$   
334  $\eta^2_p = .15$ ) such that inactive OAs had larger biases than YAs ( $t[33] = 2.8, p = .009; \alpha_{FDR} =$   
335  $.017$ ). Target also had a significant effect on bias ( $F[1.7, 78.6] = 3.8, p = .032, \eta^2_p = .08$ ) but  
336 these differences did not survive FDR correction ( $p_{\min} = .019; \alpha_{FDR} = .017$ ). The interaction of  
337 Target x Group was not significant ( $F[3.3, 78.6] = .28, p = .861$ ). To test whether the Group  
338 effect was truly due to physical inactivity of OAs and not their increased age (see Physical  
339 Activity Grouping) we correlated age and bias (averaged across all 3 targets) for the entire  
340 OA sample. The correlation was non-significant ( $r = .005, p = .977$ ) and we conclude that the  
341 group effect on bias is indeed due to the physical inactivity of OAs.

342 Contrary to our predictions, there was no effect of Group on uncertainty range ( $F[2, 45] =$   
343  $.31, p = .733$ ). There was an overall effect of Target ( $F[2, 90] = 4.8, p = .011, \eta^2_p = .10$ ), such  
344 that uncertainty range was larger at T3 than T2 ( $t[47] = -2.9, p = .006; \alpha_{FDR} = .017$ ). There  
345 was no Group x Target interaction ( $F[4, 90] = .51, p = .730$ ).

346

347

348

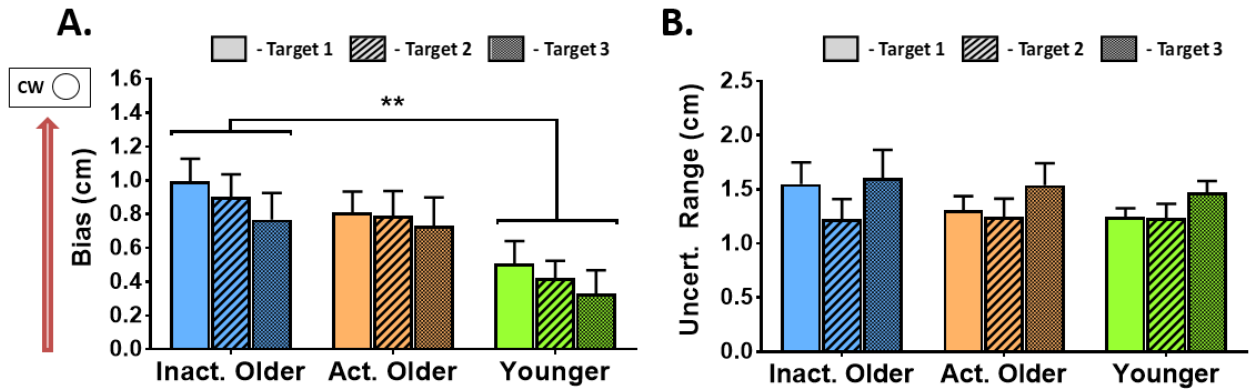

**Figure 2** – Group average data from dynamic proprioceptive task (mean  $\pm$  standard error bars, effects of Target not shown) **A.** Results for bias, where inactive older adults had significantly larger, positive biases than younger adults (\*\*  $p < .010$ , multiple comparisons subjected to FDR adjusted  $\alpha$ -threshold). Note all groups have positive biases which represents perception of hand position towards the clockwise (“Circle”) side of the targets **B.** Results for uncertainty range where there were no significant differences observed between any of the 3 groups

### 349 Kinematic Measures

350 Due to an unforeseen technical error, for 4 OAs in the physically inactive group we had only  
 351 partial kinematic data which was non-analysable; the perceptual judgement data remained  
 352 valid for all participants. For this reason kinematic data here was analysed as  $n = 12$  for  
 353 inactive OAs; the perceptual data for this sub-group did not differ from the others, tested  
 354 with a mixed-ANOVA between the excluded and retained participants (bias  $p = .99$ ,  
 355 uncertainty range  $p = .16$ ). YAs made the fastest movements ( $20.2 \pm 5.9$  cm/sec) followed by  
 356 active OAs ( $16.1 \pm 4.7$  cm/sec) and inactive OAs who moved slowest ( $14.6 \pm 5.4$  cm/sec).  
 357 Group had a significant effect on movement velocity ( $F[2, 43] = 4.6, p = .015, \eta^2_p = .18$ ) such  
 358 that inactive OAs moved significantly slower than YAs ( $t[30] = -2.7, p = .012; \alpha_{FDR} = .017$ ).  
 359 Target also had a significant main effect on movement velocity ( $F[1.7, 71.7] = 18.3, p < .001$ ,  
 360  $\eta^2_p = .30$ ), where pairwise comparisons revealed that movements were faster at T3 than  
 361 both T1 ( $t[45] = -4.9, p < .001; \alpha_{FDR} = .034$ ) and T2 ( $t[45] = -4.5, p < .001$ ). The Group x Target  
 362 interaction was not significant ( $F[3.3, 71.7] = .73, p = .552$ ).

363 Movement speed might influence perceptual performance in this task since the lateral  
364 acceleration through channel deviation (Figure 1C) would be greater for faster movements.  
365 We therefore tested if bias and uncertainty range were correlated with average movement  
366 velocity for each of the 3 different groups. We found that none of the correlations were  
367 significant for the bias ( $|r| < .34$ ,  $p_{\min} = .045$ ;  $\alpha_{\text{FDR}} = .017$ ); however the inactive OAs showed  
368 a significant, positive correlation between average movement velocity and uncertainty  
369 range ( $r = .46$ ,  $p = .008$ ;  $\alpha_{\text{FDR}} = .017$ ; all others  $|r| < .31$ ) indicating faster movements were  
370 related to lower perceptual acuity. There were no significant relationships observed  
371 between bias and mean force exerted against the final section of the channel wall for any of  
372 the 3 groups ( $|r| < .294$ ,  $p_{\min} = .096$ ;  $\alpha_{\text{FDR}} = .017$ ). This shows that systematic perceptual  
373 errors were independent of direction of effort exerted during the verbal reporting stage.

#### 374 Rapid Motor Reaching Performance

##### 375 Performance Accuracy Measures

376 Results for the LE and LE Var motor accuracy measures are shown in Figure 3A and 3B  
377 respectively. All motor accuracy data (LE and AE parameters) are shown in Table 1.

378 The effect of Group on LE was not significant ( $F[2, 48] = 1.6, p = .218$ ) but there was a  
 379 significant effect of Target ( $F[1.4, 68.8] = 51.2, p < .001, \eta^2_p = .52$ ). Pairwise comparisons  
 380 showed that LE was significantly different between all targets (T1 vs. T2,  $t[50] = 10.0, p <$   
 381  $.001$ ; T1 vs. T3,  $t[50] = 5.8, p < .001$ ; T2 vs. T3,  $t[50] = -2.2, p = .035$ ;  $\alpha_{FDR} = .050$ ), such that  
 382 lateral errors were smallest at T1 and largest at T2. The interaction of Group and Target on  
 383 LE was non-significant ( $F[2.9, 68.8] = 2.3, p = .091$ ). There were no significant effects on LE  
 384 Var for Group ( $F[2, 45] = 2.8, p = .072$ ), Target ( $F[2, 90] = 1.2, p = .308$ ) or their interaction  
 385 ( $F[4, 90] = 1.8, p = .180$ ). Thus, all groups had similar systematic and variable lateral  
 386 endpoint errors in their movements.

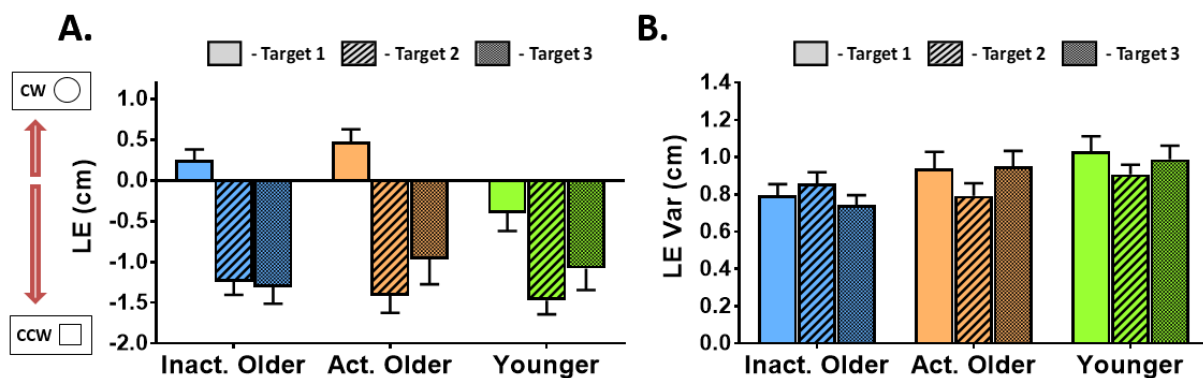

**Figure 3** – Group average motor performance accuracy measures (mean  $\pm$  standard error bars) to be used in linear regression models with proprioceptive outcomes **A.** Results for lateral endpoint error (LE), where negative error represents an end-position which deviated laterally in the counter-clockwise (“Square” from the proprioceptive task) direction and vice versa **B.** Results for the within-subject variation (standard deviation) of the LE (LE Var). There were no significant differences between groups for either measure

387 There was also no effect of Group on AE ( $F[2, 44] = 1.8, p = .181$ ) but there was a significant  
 388 effect of Target ( $F[2, 88] = 7.6, p = .001, \eta^2_p = .15$ ) with endpoint errors being significantly  
 389 larger at T2 ( $t[46] = -3.5, p = .001$ ;  $\alpha_{FDR} = .033$ ) and T3 ( $t[46] = -2.7, p = .010$ ) than at T1. The  
 390 Group x Target interaction was non-significant ( $F[4, 88] = 1.11, p = .356$ ). Neither Group ( $F[2,$   
 391  $44] = .78, p = .471$ ) nor Target ( $F[1.7, 76.7] = .93, p = .389$ ) had an effect on within-subject

392 variation of AE (AE Var), with the interaction of Target x Group also being non-significant  
393 ( $F[3.5, 76.7] = 1.4, p = .260$ ).

394 Collectively, this demonstrates a similar level of systematic and variable absolute errors  
395 between groups. This therefore shows endpoint accuracy in this motor task was maintained  
396 with advanced age, and was independent of PA.

397 Since participants were provided with accuracy feedback during the motor task, an  
398 additional ANOVA was performed on the accuracy measures in the early vs. late parts of the  
399 task (first vs. last 10 trials) to assess whether any motor learning occurred. We focus on, and  
400 report only, the factors of Time (early or late in the task) and Group x Time interaction  
401 effects from the 3 x 3 x 2 ANOVAs: (Group) x (Target) x (Time). There was a significant effect  
402 of Time on LE ( $F[1, 47] = 6.0, p = .018, \eta^2_p = 0.11$ ), AE ( $F[1, 42] = 6.2, p = .017, \eta^2_p = .13$ ) and  
403 AE Var ( $F[1, 42] = 7.0, p = .012, \eta^2_p = .14$ ) such that lateral errors, absolute errors and  
404 variation in absolute errors were all larger in the early stages of the task. However, there  
405 were no significant Group x Time interaction effects on any of the motor accuracy measures  
406 (all  $p > .050$ ). This shows that although there were improvements in performance over the  
407 duration of the task, the extent of these improvements did not differ between the 3 groups.

408

409

410

| Measure            | Group                 | Target       |               |               | <b>Overall</b> |
|--------------------|-----------------------|--------------|---------------|---------------|----------------|
|                    |                       | <b>1</b>     | <b>2</b>      | <b>3</b>      |                |
| <b>LE (cm)</b>     | <i>Inactive Older</i> | .25 (± .13)  | -1.24 (± .16) | -1.31 (± .20) | -.77 (± .12)   |
|                    | <i>Active Older</i>   | .48 (± .15)  | -1.42 (± .21) | -.97 (± .30)  | -.64 (± .15)   |
|                    | <i>Younger</i>        | -.40 (± .22) | -1.47 (± .17) | -1.08 (± .26) | -.98 (± .15)   |
| <b>LE Var (cm)</b> | <i>Inactive Older</i> | .79 (± .06)  | .86 (± .06)   | .74 (± .05)   | .80 (± .04)    |
|                    | <i>Active Older</i>   | .94 (± .09)  | .79 (± .07)   | .95 (± .08)   | .89 (± .07)    |
|                    | <i>Younger</i>        | 1.03 (± .08) | .91 (± .05)   | .99 (± .07)   | .98 (± .05)    |
| <b>AE (cm)</b>     | <i>Inactive Older</i> | 1.57 (± .08) | 2.12 (± .19)  | 2.03 (± .20)  | 1.91 (± .13)   |
|                    | <i>Active Older</i>   | 1.94 (± .13) | 2.34 (± .16)  | 2.19 (± .20)  | 2.16 (± .13)   |
|                    | <i>Younger</i>        | 2.14 (± .11) | 2.24 (± .14)  | 2.32 (± .18)  | 2.23 (± .12)   |
| <b>AE Var (cm)</b> | <i>Inactive Older</i> | .88 (± .06)  | .94 (± .07)   | .96 (± .07)   | .92 (± .05)    |
|                    | <i>Active Older</i>   | 1.06 (± .08) | .94 (± .07)   | 1.09 (± .15)  | 1.03 (± .09)   |
|                    | <i>Younger</i>        | 1.08 (± .08) | 1.00 (± .06)  | .99 (± .06)   | 1.02 (± .06)   |

**Table 1** – Group average motor performance accuracy measures for inactive older adults, active older adults, and younger adults. Values are given as means ± standard error, there were no significant group effects observed. LE = Lateral Endpoint Error, AE = Absolute Endpoint Error, in both cases Var = within-subject standard deviation (variation) in either measure

411 *Kinematic Performance Measures*

412 The data for RT and PV are summarised in Figure 4A and 4B respectively, with all kinematic  
 413 measures for the rapid motor task shown in Table 2. There was a significant effect of Group  
 414 on RT ( $F[2, 47] = 11.5, p < .001, \eta^2_p = .33$ ) whereby both inactive OAs ( $t[19.7] = 4.6, p < .001;$   
 415  $\alpha_{FDR} = .033$ ) and active OAs ( $t[18.1] = 3.7, p = .002$ ) had longer reaction times than YAs.  
 416 Likewise there was a significant effect of Target on RT ( $F[2, 94] = 15.0, p < .001, \eta^2_p = .24$ )  
 417 whereby participants reacted faster at target T1 compared to both T2 ( $t[49] = -4.1, p < .001;$   
 418  $\alpha_{FDR} = .033$ ) and T3 ( $t[49] = -4.5, p < .001$ ). The interaction effect of Group and Target on RT

419 Group had a significant effect on PV ( $F[2, 46] = 18.8, p < .001, \eta^2_p = .45$ ), where both inactive  
420 OAs ( $t[33] = -5.2, p < .001; \alpha_{FDR} = .033$ ) and active OAs ( $t[32] = -4.5, p < .001$ ) were  
421 significantly slower than YAs. Target also had a significant effect on PV ( $F[2, 92] = 32.8, p <$   
422  $.001, \eta^2_p = .55$ ), with pairwise comparisons showing each target was significantly different  
423 from one another ( $p \leq .001$  in all cases;  $\alpha_{FDR} = .050$ ) such that T3 movements were fastest  
424 and T1 movements were slowest. The interaction effect of Group and Target on PV was also  
425 significant ( $F[4, 92] = 3.5, p = .011, \eta^2_p = .13$ ) with differences across targets most  
426 pronounced for the inactive OA group (Figure 4B). However, follow-up pairwise  
427 comparisons reflect the Group effect, in that both inactive and active OAs were significantly  
428 slower than YAs at all 3 targets (all  $p < .002; \alpha_{FDR} = .033$ ).

429

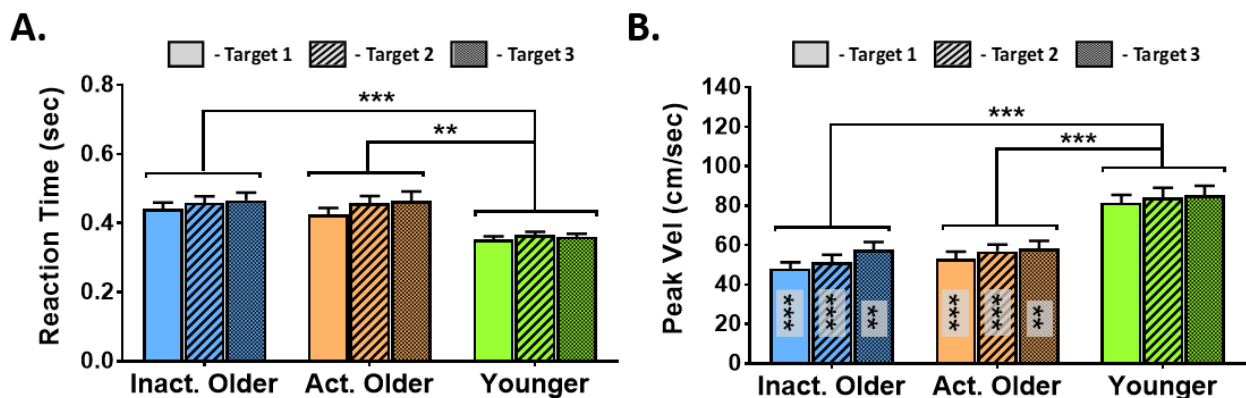

**Figure 4** – Group average kinematic data (mean  $\pm$  standard error bars) for reaction time (A) and peak hand velocity (B) in the rapid reaching task. Significant differences from younger adults are indicated by \*\* ( $p < .010$ ), \*\*\* ( $p < .001$ ) in the upper section, with multiple comparisons subjected to FDR adjusted  $\alpha$ -threshold. Asterisks within bars in panel B denote significant differences from younger adults at same target



| Measure                      | Group                 | Target                 |                        |                       | <b>Overall</b>         |
|------------------------------|-----------------------|------------------------|------------------------|-----------------------|------------------------|
|                              |                       | 1                      | 2                      | 3                     |                        |
| <b>React. Time (sec)</b>     | <i>Inactive Older</i> | .44 (± .02)            | .46 (± .02)            | .47 (± .02)           | <b>***.46 (± .02)</b>  |
|                              | <i>Active Older</i>   | .42 (± .02)            | .46 (± .02)            | .46 (± .03)           | <b>** .45 (± .02)</b>  |
|                              | <i>Younger</i>        | .35 (± .01)            | .37 (± .01)            | .36 (± .01)           | .36 (± .01)            |
| <b>Peak Vel. (cm/sec)</b>    | <i>Inactive Older</i> | <b>***48.1 (± 3.2)</b> | <b>***51.2 (± 3.9)</b> | <b>**57.6 (± 3.9)</b> | <b>***52.3 (± 3.6)</b> |
|                              | <i>Active Older</i>   | <b>***53.0 (± 3.7)</b> | <b>***56.8 (± 3.5)</b> | <b>**58.1 (± 4.1)</b> | <b>***55.9 (± 3.7)</b> |
|                              | <i>Younger</i>        | 81.4 (± 4.0)           | 84.3 (± 4.8)           | 85.3 (± 4.7)          | 83.7 (± 4.5)           |
| <b>Move. Time (sec)</b>      | <i>Inactive Older</i> | <b>***.77 (± .05)</b>  | <b>***.73 (± .05)</b>  | <b>***.65 (± .04)</b> | <b>***.72 (± .05)</b>  |
|                              | <i>Active Older</i>   | <b>***.73 (± .05)</b>  | <b>***.68 (± .04)</b>  | <b>***.66 (± .04)</b> | <b>***.69 (± .04)</b>  |
|                              | <i>Younger</i>        | .49 (± .02)            | .46 (± .02)            | .45 (± .01)           | .47 (± .02)            |
| <b>TPV (% Move Duration)</b> | <i>Inactive Older</i> | 42.5 (± 1.2)           | 43.6 (± 1.3)           | 47.4 (± 1.5)          | 44.5 (± 1.2)           |
|                              | <i>Active Older</i>   | 41.1 (± 1.3)           | 42.7 (± 1.7)           | 44.6 (± 1.5)          | 42.8 (± 1.4)           |
|                              | <i>Younger</i>        | 42.9 (± .5)            | 44.2 (± .6)            | 46.0 (± .6)           | 44.4 (± .5)            |

**Table 2** – Group average kinematic data (means ± standard error) for the rapid reaching task. Significant differences from younger adults are indicated by \*\* ( $p < .010$ ) and \*\*\* ( $p < .001$ ; multiple comparisons subjected to FDR adjusted  $\alpha$ -threshold). React. Time = Reaction Time, Peak Vel. = Peak Hand Velocity, Move. Time = Movement Time, TPV = Time to Peak Velocity

430 There was a significant effect of Group on MT ( $F[2, 47] = 15.0, p < .001, \eta^2_p = .39$ ), such that  
431 both inactive OAs ( $t[18.0] = 4.9, p < .001; \alpha_{FDR} = .033$ ) and active OAs ( $t[17.5] = 4.8, p < .001$ )  
432 made longer duration movements than YAs. There was also a main effect of Target ( $F[1.5,$   
433  $72.3] = 45.3, p < .001, \eta^2_p = .49$ ) where all targets were significantly different from one  
434 another (all  $p < .001; \alpha_{FDR} = .050$ ) such that movements were made with the shortest  
435 duration to T3 and longest to T1. The Group by Target interaction was also significant for MT  
436 ( $F[3.1, 72.3] = 5.2, p = .003, \eta^2_p = .18$ ), but as with the peak velocity measure, follow-up  
437 pairwise comparisons reflected the main effect of Group with both inactive (all  $p < .001; \alpha_{FDR}$   
438  $= .033$ ) and active OAs (all  $p < .001$ ) displaying longer movement durations than YAs at all  
439 targets.

440 The main effect of Group on TPV was not significant ( $F[2, 47] = .77, p = .473$ ). However,  
441 there was a main effect of Target ( $F[2, 94] = 33.7, p < .001, \eta^2_p = .42$ ) whereby TPV was  
442 significantly different between all 3 targets ( $p < .002$  in all cases;  $\alpha_{FDR} = .050$ ) such that peak  
443 velocity occurred later in movements to T3 and earlier in movements to T1. There was no  
444 interaction of Group and Target on DPV ( $F[4, 94] = 1.1, p = .382$ ).

445 Together, the results from these kinematic measures shows that there were target-specific  
446 common kinematic features across all three groups, but overall, the OAs tend to react and  
447 move more slowly than YAs, regardless of their PA level. However, the shape of velocity  
448 profiles of movements were similar between all groups.

#### 449 Speed-Accuracy Trade-off

450 Since there were significant differences in peak hand velocity between older and younger  
451 groups, we wanted to test for a potential speed-accuracy trade-off. We therefore divided  
452 both LE and AE values by corresponding PV on a trial-by-trial basis to create lateral and  
453 absolute error indices controlled for movement speed ( $LE_{PVCont}$  and  $AE_{PVCont}$  respectively),  
454 then analysed by 3 x 3 mixed-design ANOVAs: (Group) x (Target), as above.

455 There was no effect of Group on  $LE_{PVCont}$  ( $F[2, 46] = .19, p = .826$ ) but the main effect of  
456 Target was significant ( $F[1.6, 73.7] = 58.1, p < .001, \eta^2_p = .56$ ; see Figure 5A). Pairwise  
457 comparisons showed that velocity controlled lateral errors were significantly different  
458 between all targets (T1 vs. T2,  $t[48] = 9.2, p < .001$ ; T1 vs. T3,  $t[48] = 6.0, p < .001$ ; T2 vs. T3,  
459  $t[48] = -2.4, p = .018$ ;  $\alpha_{FDR} = .050$ ), with smallest errors at T1 and largest at T2. The Group x  
460 Target interaction  $LE_{PVCont}$  was also significant ( $F[3.2, 73.7] = 4.8, p = .004, \eta^2_p = .17$ ). There

461 was a trend towards both active ( $t[33] = 2.6, p = .0063, \alpha_{FDR} = .0056$ ) and inactive ( $t[33] =$   
 462  $2.6, p = .015$ ) OAs having more positive velocity controlled lateral errors than YAs at T1, but  
 463 these effects did not survive FDR correction ( $p_{min} = .085$  for other of 3 [Group] x 3 [Target]  
 464 comparisons).

465 The Group effect on  $AE_{PVCont}$  was significant ( $F[2, 42] = 4.2, p = .021, \eta^2_p = .17$ ; Figure 5B) but  
 466 follow-up pairwise comparisons did not reveal any specific group differences after FDR  
 467 correction, despite both active ( $t[30] = 2.5, p = .0171; \alpha_{FDR} = .0166$ ) and inactive ( $t[30] = 2.2,$   
 468  $p = .035$ ) OAs showing trends towards having larger velocity controlled absolute errors than  
 469 YAs. There was also a significant main effect of Target ( $F[2, 84] = 4.2, p = .023, \eta^2_p = .09$ ) but  
 470 follow-up pairwise comparisons were not significant following FDR correction ( $p_{min} = .020;$   
 471  $\alpha_{FDR} = .017$ ). The Group x Target interaction on  $AE_{PVCont}$  was not significant ( $F[4, 84] = .73, p =$   
 472  $.574$ ).

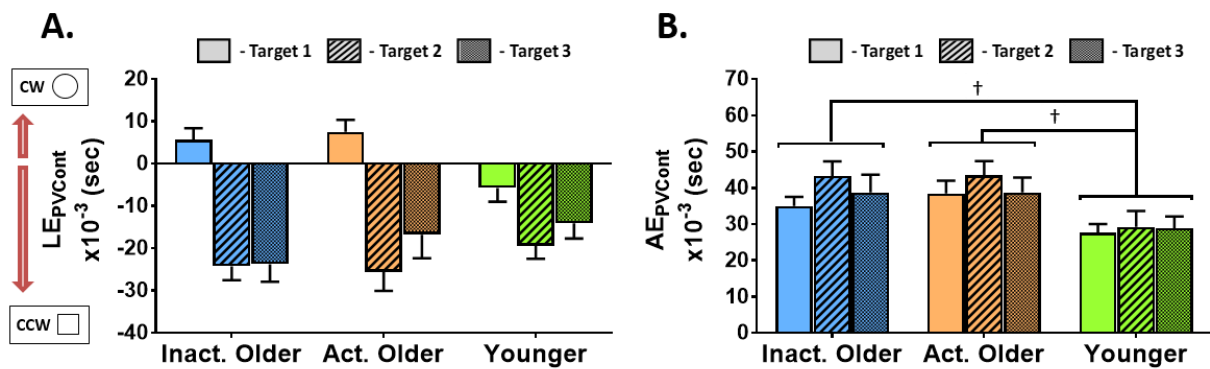

**Figure 5** – Group average motor accuracy measures controlled for by peak hand velocity (means  $\pm$  standard error). **A.** Lateral error divided by peak hand velocity ( $LE_{PVCont}$ ) where more positive values represent errors to the clockwise (or “Circle” from proprioceptive task) side. **B.** Absolute errors divided by peak hand velocity ( $AE_{PVCont}$ ). Pairwise comparisons which were significant ( $p < .05$ ) but did not survive corrections for multiple comparisons are indicated by †

473

474 Collectively, this additional analysis of the speed-accuracy trade-off shows that the

475 maintenance of absolute endpoint accuracy in OAs may be partially explained by movement

476 slowing. However, the lateral errors appear to be similar between age groups even when  
477 controlling for movement speed, suggesting they may be less susceptible to a speed-  
478 accuracy trade-off in this context.

#### 479 Working Memory Capacity

480 All groups had similar working memory capacity scores, as indicated by a non-significant  
481 one-way ANOVA ( $F[2, 48] = .16, p = .854$ ). YAs had the highest score ( $5.8 \pm 1.6$  numbers  
482 recalled) followed by active OAs ( $5.7 \pm 1.4$ ) and inactive OAs with the lowest score ( $5.5 \pm$   
483  $1.3$ ). To test if working memory was related to proprioceptive performance, we correlated  
484 the bias and uncertainty range, averaged across all 3 targets, with working memory score.  
485 There were no significant relationships found (all  $|r| < .38, p_{\min} = .106; \alpha_{\text{FDR}} = .008$ ), showing  
486 proprioceptive performance was independent of working memory.

#### 487 Predicting Motor Performance from Proprioceptive Acuity

488 To allow visual comparison of the reaching performance with the proprioceptive measures,  
489 the spatial distribution of individuals' average end-positions and the 95% confidence  
490 interval ellipses in the motor reaching task are shown in Figure 6 for each target, with the  
491 bias and uncertainty range from the proprioceptive task shown in bar-format.

492 We generated 2 regression models for each proprioceptive-motor performance pairing,  
493 collapsing data across all 3 targets, giving 4 models overall. Neither the bias and LE (OAs,  $R^2$   
494  $= .002$ ; YAs,  $R^2 = .020$ ) nor the uncertainty range and LE Var (OAs,  $R^2 = .060$ ; YAs,  $R^2 = .035$ ;  
495  $p_{\min} = .090; \alpha_{\text{FDR}} = .013$ ) models were significant (see Table 3 for summary). We did observe

496 that uncertainty range was a significant, negative predictor of LE Var for OAs only ( $\beta = -.245$ ;  
497  $p = .030$ ), however, this did not survive corrections for multiple comparisons and the overall  
498 model still accounted for only 6% of the variance in the data. The lack of relationship  
499 between proprioceptive uncertainty and motor error in advanced age contradicts our  
500 original prediction, and no consistent positive association was seen in any group.

501

502

503

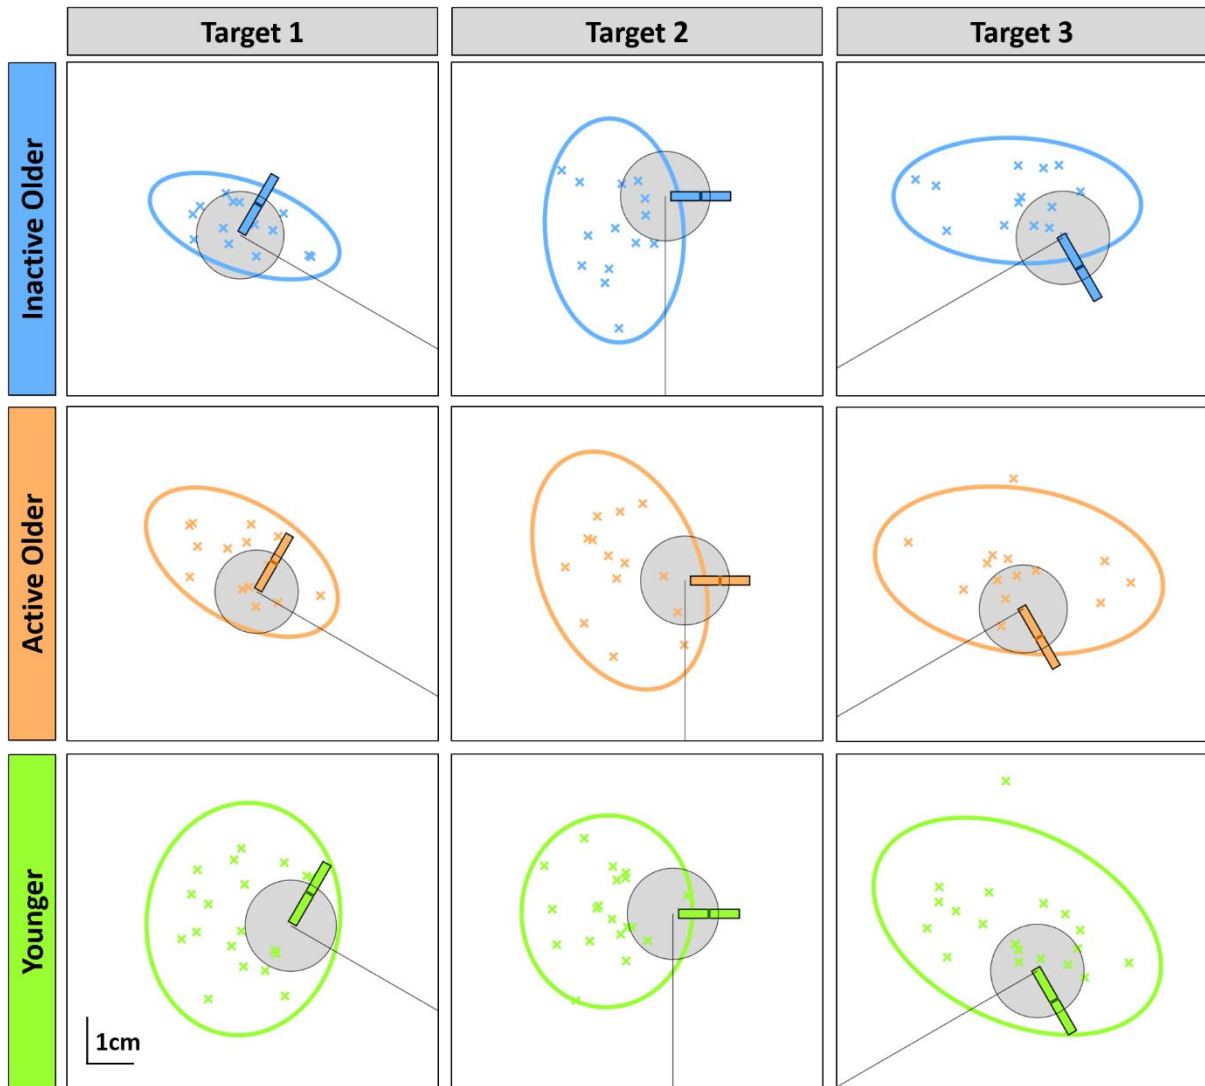

**Figure 6** – Individual participant average end-positions from rapid motor task (coloured ‘X’ markers) and 95% confidence ellipses for each of the different groups and targets. Group average data from dynamic proprioceptive task is scaled and superimposed over targets as coloured bars. The central thick coloured line in each bar represents the bias and on average shows participants perceived their hand to be more towards the clockwise (“Circle”) side of the target. The length of the coloured bar represents the uncertainty range and was similar between groups (figure generated for visualisation purposes only)

504

505

506

507

| Model                                  | Group          | Model Measure  |                          |             |
|----------------------------------------|----------------|----------------|--------------------------|-------------|
|                                        |                | R <sup>2</sup> | Propriocept.<br>β-Coeff. | PA β-Coeff. |
| <b>LE predicted by Bias and PA</b>     | <i>Older</i>   | .002           | -.022                    | .041        |
|                                        | <i>Younger</i> | .020           | -.137                    | .022        |
| <b>LE Var predicted by UncR and PA</b> | <i>Older</i>   | .060           | -.245 <sup>†</sup>       | .002        |
|                                        | <i>Younger</i> | .035           | -.152                    | -.103       |

**Table 3.** – Summary of statistics for linear regression models predicting motor accuracy from proprioceptive and physical activity (PA) measures. Upper panel shows lateral error (LE) predicted by bias and PA, lower panel shows lateral error variability (LE Var) predicted by uncertainty range (UncR) and PA. All models were non-significant ( $p_{\min} = .090$ ;  $\alpha_{\text{FDR}} = .013$ ), with † indicating significant standardized coefficient ( $p < .05$ ) which did not survive corrections for multiple comparisons.

## 508 **Discussion**

509 This experiment aimed to determine the relationship between dynamic proprioceptive  
510 acuity and movement control in the upper limb with advanced age. Although we found  
511 stereotypical features of ageing in motor kinematics, we also found that proprioceptive bias,  
512 and not uncertainty range, was larger for physically inactive OAs, contrasting to our  
513 predictions. While we did observe a trend towards higher uncertainty range predicting  
514 lower variability in motor accuracy for OAs, the direction of this relationship and its limited  
515 strength ( $R^2 = .06$ ) lead us to conclude a negligible association overall. Ultimately,  
516 proprioceptive uncertainty was not consistently related to variability in movement accuracy;  
517 thus, we find no evidence to link proprioception and movement control in either older or  
518 younger adults in this experiment.

519 Our results replicate the findings of Helsen et al. (2016), who showed a dissociation of  
520 proprioceptive acuity and rapid motor performance, but we extend beyond their results to  
521 show this is true when proprioception is measured via an active movement task, which

522 more closely mimics the sensation involved in voluntary movement. Helsen et al. (2016)  
523 concluded that OAs were able to overcome a decline in sensory acuity through increased  
524 reliance on predictive control mechanisms in a “play-it-safe” strategy (Elliott et al., 2010).  
525 We also saw evidence that OAs tend to emphasise accuracy over speed, exemplified by their  
526 increased reaction times and reduced peak velocities. These speed differences may partially  
527 explain the comparable endpoint accuracy seen between groups (Figure 5B); a finding which  
528 has also been reported elsewhere (Helsen et al., 2016; Lee et al., 2007; Seidler-Dobrin &  
529 Stelmach, 1998). We note that the utility of online proprioceptive feedback in fast, discrete,  
530 movements is likely reduced compared to slower, guided movements, and the reliance on  
531 predictive mechanisms may therefore already be high in our reaching task (Miall & Wolpert,  
532 1996; Shadmehr, Smith, & Krakauer, 2010; Wolpert, Ghahramani, & Jordan, 1995).  
533 However, if OAs do tend to favour accuracy over speed, as our data suggest and as others  
534 have argued (Forstmann et al., 2011), then it seems unlikely they would opt to make  
535 movements so rapidly that feedback control would be completely negated. In the future, it  
536 may therefore be interesting to examine the relationship between proprioception and  
537 motor control in movement tasks that deliberately emphasise sensory guidance. This could  
538 include more continuous movements such as circular tracking (Levy-Tzedek, 2017), in which  
539 OAs increase movement radius and speed to a greater extent than YAs, upon removal of  
540 visual feedback. Alternatively, training in the control of objects in virtual environments, such  
541 as the ball balancing task reported recently by Elangovan, Cappello, Masia, Aman, &  
542 Konczak (2017), which increases proprioceptive acuity of the wrist. But perhaps a more  
543 commonly employed paradigm that can probe proprioceptive regulation of motor control is  
544 adaptation to novel field dynamics, where mechanical perturbations to the arm create



545 unexpected trajectory deviations during reaching (Shadmehr & Mussa-Ivaldi, 1994). In  
546 ageing, this task has been studied surprisingly scarcely, with mixed findings on the extent to  
547 which adaptation is impaired in later life (Cesqui, Macri, Dario, & Micera, 2008; Huang &  
548 Ahmed, 2014; Reuter, Pearcey, & Carroll, 2018; Trewartha, Garcia, Wolpert, & Flanagan,  
549 2014). Considering proprioceptive feedback is necessary to minimise within-trial  
550 performance errors in these tasks (Miall et al., 2018; Sarlegna, Malfait, Bringoux, Bourdin, &  
551 Vercher, 2010; Yousif, Cole, Rothwell, & Diedrichsen, 2015), it may be that proprioceptive  
552 acuity could account for some of the reported variance in age-related adaptation  
553 impairments. Moreover, since we report age and physical activity effects on proprioceptive  
554 bias, it would be interesting to see whether older participants recalibrate their  
555 proprioceptive sensation with forcefield learning in a similar way to YAs (Ostry et al., 2010),  
556 and if this predicts their adaptive performance.

557 Contrary to our predictions and to prior literature, we showed that physical inactivity did  
558 not increase proprioceptive uncertainty in OAs. We suggest this novel finding reflects the  
559 steps we took to remove confounds when measuring proprioception. Namely, we used  
560 active instead of passive movements (Smith et al., 2009) which minimises position matching  
561 errors in both older and younger adults (Erickson & Karduna, 2012; Langan, 2014; Lönn et  
562 al., 2000). We also required instantaneous perceptual judgements to minimise age-  
563 dependent memory effects (Goble et al., 2012), and we avoided comparison between the  
564 two arms to minimise effects of central degeneration, which may compromise  
565 interhemispheric transfer of sensorimotor signals (Hou & Pakkenberg, 2012). Instead, we  
566 were able to measure a significant increase in systematic perceptual error for the physically

567 inactive OAs. Proprioceptive biases have been well established for reaching and pointing  
568 movements (Cressman et al., 2010; van Beers, Sittig, & van der Gon, 1998; Vindras,  
569 Desmurget, Prablanc, & Viviani, 1998; Wilson, Wong, & Gribble, 2010) and perception of  
570 limb position is frequently biased towards the side of the body where the limb is tested.  
571 These biases have been shown to be dependent on several task-specific factors, such as  
572 reach distance (van Beers et al., 1998; Wilson et al., 2010), limb used (Wilson et al., 2010;  
573 Wong, Wilson, Kistemaker, & Gribble, 2014) and whether visual or haptic reference  
574 positions are used (Kuling, Brenner, & Smeets, 2016). Less is known about individual  
575 differences which influence the presentation of these errors, or the mechanism by which  
576 they may occur. Here, we have shown that physical inactivity in ageing is a contributing  
577 factor. Although the cause is as yet unclear, a reduction in physical activity could lead to  
578 everyday limb movements being made within a more concentrated volume, ipsilateral to  
579 the limb (Howard, Ingram, Körding, & Wolpert, 2009), biasing sensory experience to this  
580 region. Increased sensory uncertainty upon removal of vision (as in the proprioceptive  
581 assessment task) may therefore lead to greater reliance on prior experience during the  
582 optimal estimation of limb position (Gritsenko, Krouchev, & Kalaska, 2007; Körding &  
583 Wolpert, 2006). We also note that spindle afferents are directionally tuned to specific  
584 movements (Bergenheim, Ribot-Ciscar, & Roll, 2000; Jones, Wessberg, & Vallbo, 2001) and  
585 loss of intrafusal fibres with age has been shown to be muscle specific (Kararizou, Manta,  
586 Kalfakis, & Vassilopoulos, 2005). Therefore if movements are indeed limited to a smaller  
587 range in physically inactive adults, a selective loss of intrafusal fibres which are directionally  
588 tuned to the less frequent movements, might result. Collectively, these effects could lead to  
589 the increase in proprioceptive bias we observed in the physically inactive OAs.

590 Unfortunately, the wrist-worn accelerometers we used do not provide spatial information,  
591 and this suggestion remains to be tested. An alternative could be that the perceptual bias  
592 arose from proprioceptive drift (Brown, Rosenbaum, & Sainburg, 2003b, 2003a; Desmurget,  
593 Vindras, Gréa, Viviani, & Grafton, 2000). However, drift is typically observed during  
594 repetitive, unconstrained movements and has been attributed to the persistence of motor  
595 errors rather than to proprioceptive fading (Brown et al., 2003b). In addition, the extent of  
596 proprioceptive drift has been associated with movement speed (Brown et al., 2003b), and  
597 we found no association between bias and movement velocity.

598 We do, however, report a positive correlation of average movement speed and uncertainty  
599 range in the proprioceptive task for the inactive OAs. This observation may further reflect a  
600 speed-accuracy trade-off where insufficient sensory information is accumulated to make  
601 reliable perceptual judgements as movement speed increases (Bogacz, Wagenmakers,  
602 Forstmann, & Nieuwenhuis, 2010; Heekeren, Marrett, & Ungerleider, 2008). In advanced  
603 age there is a high susceptibility to prefrontal cortex degeneration (Giorgio et al., 2010;  
604 Salat, 2004) which can be mediated by physical inactivity (Colcombe et al., 2003). Both  
605 attention and memory depend on these frontal brain regions and have been reported to  
606 influence the accuracy of limb position matching (Goble et al., 2012). Limited cognitive  
607 resources in the inactive OAs might therefore impair their ability to process sensory  
608 feedback for perceptual judgements. However, we found no relationship between verbal  
609 working memory score and perceptual acuity for any group, suggesting this is not a factor in  
610 our inactive elderly group.

611 In conclusion, we found systematic differences in movement kinematics in OAs compared to  
612 YAs, as expected from previous reports. We also found an age-dependent increase in  
613 proprioceptive bias measured in active, multi-joint movement, but not of uncertainty range.  
614 This finding is novel and may reflect our careful task design which aimed to remove  
615 methodological confounds for testing with an ageing population. However, we did not find  
616 any evidence to suggest that proprioceptive acuity is related to performance in rapid, goal-  
617 orientated movement, in either older or younger adults. The relationship between  
618 proprioceptive acuity and motor control remains uncertain, and warrants further  
619 investigation under movement conditions which emphasise the utility of online  
620 proprioceptive feedback.

621

622

623

624

625

626

627

628

629

630 **Reference List**

- 631 1. Adamo, D. E., Alexander, N. B., & Brown, S. H. (2009). The Influence of Age and Physical  
632 Activity on Upper Limb Proprioceptive Ability. *J Aging Phys Act*, 17(3), 272–293.
- 633 2. Adamo, D. E., Martin, B. J., & Brown, S. H. (2007). Age-related differences in upper limb  
634 proprioceptive acuity. *Perceptual and Motor Skills*, 104(3 Pt 2), 1297–1309.
- 635 3. Benjamini, Y., & Hochberg, Y. (1995). Controlling the false discovery rate: a practical and  
636 powerful approach to multiple testing. *Journal of the Royal Statistical Society. Series B*  
637 *(Methodological)*, 289–300.
- 638 4. Bergenheim, M., Ribot-Ciscar, E., & Roll, J.-P. (2000). Proprioceptive population coding of  
639 two-dimensional limb movements in humans: I. Muscle spindle feedback during spatially  
640 oriented movements. *Experimental Brain Research*, 134(3), 301–310.
- 641 5. Bogacz, R., Wagenmakers, E.-J., Forstmann, B. U., & Nieuwenhuis, S. (2010). The neural  
642 basis of the speed–accuracy tradeoff. *Trends in Neurosciences*, 33(1), 10–16.
- 643 6. Boisgontier, M. P., Olivier, I., Chenu, O., & Nougier, V. (2012). Presbypropria: the effects  
644 of physiological ageing on proprioceptive control. *AGE*, 34(5), 1179–1194.
- 645 7. Boisgontier, M. P., Van Halewyck, F., Corporaal, S. H. A., Willacker, L., Van Den Bergh, V.,  
646 Beets, I. A. M., ... Swinnen, S. P. (2014). Vision of the active limb impairs bimanual motor  
647 tracking in young and older adults. *Frontiers in Aging Neuroscience*, 6.

- 648 8. Brown, L. E., Rosenbaum, D. A., & Sainburg, R. L. (2003a). Limb Position Drift:  
649 Implications for Control of Posture and Movement. *Journal of Neurophysiology*, *90*(5),  
650 3105–3118.
- 651 9. Brown, L. E., Rosenbaum, D. A., & Sainburg, R. L. (2003b). Movement speed effects on  
652 limb position drift. *Experimental Brain Research*, *153*(2), 266–274.
- 653 10. Ceballos, D., Cuadras, J., Verdu, E., & Navarro, X. (1999). Morphometric and  
654 ultrastructural changes with ageing in mouse peripheral nerve. *Journal of Anatomy*,  
655 *195*(4), 563–576.
- 656 11. Cesqui, B., Macri, G., Dario, P., & Micera, S. (2008). Characterization of age-related  
657 modifications of upper limb motor control strategies in a new dynamic environment.  
658 *Journal of NeuroEngineering and Rehabilitation*, *5*(1), 31.
- 659 12. Colcombe, S. J., Erickson, K. I., Raz, N., Webb, A. G., Cohen, N. J., McAuley, E., & Kramer,  
660 A. F. (2003). Aerobic Fitness Reduces Brain Tissue Loss in Aging Humans. *The Journals of*  
661 *Gerontology Series A: Biological Sciences and Medical Sciences*, *58*(2), M176–M180.
- 662 13. Contreras-Vidal, J. L., Teulings, H. L., & Stelmach, G. E. (1998). Elderly Subjects are  
663 Impaired in Spatial Coordination of Fine Motor Control. *Acta Psychologica*, *100*, 25–35.
- 664 14. Craig, C. L., Marshall, A. L., Sjöström, M., Bauman, A. E., Booth, M. L., Ainsworth, B. E., ...  
665 Oja, P. (2003). International Physical Activity Questionnaire: 12-Country Reliability and  
666 Validity: *Medicine & Science in Sports & Exercise*, *35*(8), 1381–1395.

- 667 15. Cressman, E. K., & Henriques, D. Y. P. (2009). Sensory Recalibration of Hand Position  
668 Following Visuomotor Adaptation. *Journal of Neurophysiology*, *102*(6), 3505–3518.
- 669 16. Cressman, E. K., Salomonczyk, D., & Henriques, D. Y. P. (2010). Visuomotor adaptation  
670 and proprioceptive recalibration in older adults. *Experimental Brain Research*, *205*(4),  
671 533–544.
- 672 17. Curran-Everett, D. (2000). Multiple comparisons: philosophies and illustrations.  
673 *American Journal of Physiology-Regulatory, Integrative and Comparative Physiology*,  
674 *279*(1), R1–R8.
- 675 18. Darling, W. G., Cooke, J. D., & Brown, S. H. (1989). Control of simple arm movements in  
676 elderly humans. *Neurobiology of Aging*, *10*(2), 149–157.
- 677 19. Desmurget, M., Vindras, P., Gréa, H., Viviani, P., & Grafton, S. T. (2000). Proprioception  
678 does not quickly drift during visual occlusion. *Experimental Brain Research*, *134*(3), 363–  
679 377.
- 680 20. Elangovan, N., Cappello, L., Masia, L., Aman, J., & Konczak, J. (2017). A robot-aided visuo-  
681 motor training that improves proprioception and spatial accuracy of untrained  
682 movement. *Scientific Reports*, *7*(1).
- 683 21. Elliott, D., Hansen, S., Grierson, L. E. M., Lyons, J., Bennett, S. J., & Hayes, S. J. (2010).  
684 Goal-directed aiming: Two components but multiple processes. *Psychological Bulletin*,  
685 *136*(6), 1023–1044.

- 686 22. Erickson, R. I. C., & Karduna, A. R. (2012). Three-dimensional repositioning tasks show  
687 differences in joint position sense between active and passive shoulder motion. *Journal*  
688 *of Orthopaedic Research*, 30(5), 787–792.
- 689 23. Forstmann, B. U., Tittgemeyer, M., Wagenmakers, E.-J., Derrfuss, J., Imperati, D., &  
690 Brown, S. (2011). The Speed-Accuracy Tradeoff in the Elderly Brain: A Structural Model-  
691 Based Approach. *Journal of Neuroscience*, 31(47), 17242–17249.
- 692 24. Giorgio, A., Santelli, L., Tomassini, V., Bosnell, R., Smith, S., De Stefano, N., & Johansen-  
693 Berg, H. (2010). Age-related changes in grey and white matter structure throughout  
694 adulthood. *NeuroImage*, 51(3), 943–951.
- 695 25. Goble, D. J., Coxon, J. P., Wenderoth, N., Van Impe, A., & Swinnen, S. P. (2009).  
696 Proprioceptive sensibility in the elderly: Degeneration, functional consequences and  
697 plastic-adaptive processes. *Neuroscience & Biobehavioral Reviews*, 33(3), 271–278.
- 698 26. Goble, D. J., Mousigian, M. A., & Brown, S. H. (2012). Compromised encoding of  
699 proprioceptively determined joint angles in older adults: the role of working memory  
700 and attentional load. *Experimental Brain Research*, 216(1), 35–40.
- 701 27. Gritsenko, V., Krouchev, N. I., & Kalaska, J. F. (2007). Afferent Input, Efference Copy,  
702 Signal Noise, and Biases in Perception of Joint Angle During Active Versus Passive Elbow  
703 Movements. *Journal of Neurophysiology*, 98(3), 1140–1154.



- 704 28. Heekeren, H. R., Marrett, S., & Ungerleider, L. G. (2008). The neural systems that  
705 mediate human perceptual decision making. *Nature Reviews Neuroscience*, *9*(6), 467–  
706 479.
- 707 29. Helsen, W. F., Van Halewyck, F., Levin, O., Boisgontier, M. P., Lavrysen, A., & Elliott, D.  
708 (2016). Manual aiming in healthy aging: does proprioceptive acuity make the difference?  
709 *Age (Dordr)*, *38*(2).
- 710 30. Herter, T. M., Scott, S. H., & Dukelow, S. P. (2014). Systematic Changes in Position Sense  
711 Accompany Normal Aging Across Adulthood. *Journal of Engineering and Rehabilitation*,  
712 *11*(43).
- 713 31. Hou, J., & Pakkenberg, B. (2012). Age-related degeneration of corpus callosum in the 90+  
714 years measured with stereology. *Neurobiology of Aging*, *33*(5), 1009.e1-1009.e9.
- 715 32. Howard, I. S., Ingram, J. N., Körding, K. P., & Wolpert, D. M. (2009). Statistics of Natural  
716 Movements Are Reflected in Motor Errors. *Journal of Neurophysiology*, *102*(3), 1902–  
717 1910.
- 718 33. Howard, I. S., Ingram, J. N., & Wolpert, D. M. (2009). A modular planar robotic  
719 manipulandum with end-point torque control. *Journal of Neuroscience Methods*, *181*(2),  
720 199–211.
- 721 34. Huang, H. J., & Ahmed, A. A. (2014). Older adults learn less, but still reduce metabolic  
722 cost, during motor adaptation. *Journal of Neurophysiology*, *111*(1), 135–144.

- 723 35. Hurley, M. V., Rees, J., & Newham, D. J. (1998). Quadriceps Function, Proprioceptive  
724 Acuity and Functional Performance in Healthy Young, Middle-Aged and Elderly Subjects.  
725 *Age and Ageing*, 27, 55–62.
- 726 36. Jacobs, J. M., & Love, S. (1985). Qualitative and quantitative morphology of human sural  
727 nerve at different ages. *Brain*, 108(4), 897–924.
- 728 37. Jones, K. E., Wessberg, J., & Vallbo, Å. B. (2001). Directional Tuning of Human Forearm  
729 Muscle Afferents During Voluntary Wrist Movements. *Journal of Physiology*, 536.2, 635–  
730 647.
- 731 38. Kararizou, E., Manta, P., Kalfakis, N., & Vassilopoulos, D. (2005). Morphometric Study of  
732 the Human Muscle Spindle. *Anal Quant Cytol Histol*, 27(1), 1–4.
- 733 39. Ketcham, C. J., Seidler, R. D., Van Gemmert, A. W. A., & Stelmach, G. E. (2002). Age-  
734 Related Kinematic Differences as Influenced by Task Difficulty, Target Size, and  
735 Movement Amplitude. *J Gerontol B Psychol Sci Soc Sci*, 57, 54–64.
- 736 40. Körding, K. P., & Wolpert, D. M. (2006). Bayesian decision theory in sensorimotor  
737 control. *Trends in Cognitive Sciences*, 10(7), 319–326.
- 738 41. Kuling, I. A., Brenner, E., & Smeets, J. B. J. (2016). Errors in visuo-haptic and haptic-haptic  
739 location matching are stable over long periods of time. *Acta Psychologica*, 166, 31–36.
- 740 42. Langan, J. (2014). Older adults demonstrate greater accuracy in joint position matching  
741 using self-guided movements. *Human Movement Science*, 36, 97–106.

- 742 43. Lee, G., Fradet, L., Ketcham, C. J., & Dounskaia, N. (2007). Efficient control of arm  
743 movements in advanced age. *Experimental Brain Research*, 177(1), 78–94.
- 744 44. Lei, Y., & Wang, J. (2018). The effect of proprioceptive acuity variability on motor  
745 adaptation in older adults. *Experimental Brain Research*, 236(2), 599–608.
- 746 45. Levy-Tzedek, S. (2017). Motor errors lead to enhanced performance in older adults.  
747 *Scientific Reports*, 7(1).
- 748 46. Lexell, J. (1995). Human aging, muscle mass, and fiber type composition. *The Journals of*  
749 *Gerontology. Series A, Biological Sciences and Medical Sciences*, 50 Spec No, 11–16.
- 750 47. Lönn, J., Crenshaw, A. G., Djupsjöbacka, M., Pedersen, J., & Johansson, H. (2000).  
751 Position Sense Testing. Influence of Starting Position and Type of Displacement. *Archives*  
752 *of Physical Medicine and Rehabilitation*, 81(5), 592–597.
- 753 48. Lord, S. R., Clark, R. D., & Webster, I. W. (1991). Postural Stability and Associated  
754 Physiological Factors in a Population of Aged Persons. *Journal of Gerontology*, 46(3),  
755 M69-76.
- 756 49. Miall, R. C., Kitchen, N. M., Nam, S.-H., Lefumat, H., Renault, A. G., Ørstavik, K., ...  
757 Sarlegna, F. R. (2018). Proprioceptive loss and the perception, control and learning of  
758 arm movements in humans: evidence from sensory neuronopathy. *Experimental Brain*  
759 *Research*, 236(8), 2137–2155.

- 760 50. Miall, R. C., & Wolpert, D. M. (1996). Forward Models for Physiological Motor Control.  
761 *Neural Networks*, 9(8), 1265–1279.
- 762 51. Morley, J. E., Baumgartner, R. N., Roubenoff, R., Mayer, J., & Nair, K. S. (2001).  
763 Sarcopenia. *Journal of Laboratory and Clinical Medicine*, 137(4), 231–243.
- 764 52. Nasreddine, Z. S., Phillips, N. A., Bédirian, V., Charbonneau, S., Whitehead, V., Collin, I., ...  
765 Chertkow, H. (2005). The Montreal Cognitive Assessment, MoCA: a brief screening tool  
766 for mild cognitive impairment. *Journal of the American Geriatrics Society*, 53(4), 695–  
767 699.
- 768 53. Oldfield, R. C. (1971). The assessment and analysis of handedness: the Edinburgh  
769 inventory. *Neuropsychologia*, 9(1), 97–113.
- 770 54. Ostry, D. J., Darainy, M., Mattar, A. A. G., Wong, J., & Gribble, P. L. (2010).  
771 Somatosensory Plasticity and Motor Learning. *Journal of Neuroscience*, 30(15), 5384–  
772 5393.
- 773 55. Reuter, E.-M., Pearcey, G. E. P., & Carroll, T. J. (2018). Greater neural responses to  
774 trajectory errors are associated with superior force field adaptation in older adults.  
775 *Experimental Gerontology*, 110, 105–117.
- 776 56. Salat, D. H. (2004). Thinning of the Cerebral Cortex in Aging. *Cerebral Cortex*, 14(7), 721–  
777 730.

- 778 57. Sarlegna, F. R., Malfait, N., Bringoux, L., Bourdin, C., & Vercher, J.-L. (2010). Force-field  
779 adaptation without proprioception: Can vision be used to model limb dynamics?  
780 *Neuropsychologia*, 48(1), 60–67.
- 781 58. Schaap, T. S., Gonzales, T. I., Janssen, T. W. J., & Brown, S. H. (2015). Proprioceptively  
782 guided reaching movements in 3D space: effects of age, task complexity and  
783 handedness. *Experimental Brain Research*, 233(2), 631–639.
- 784 59. Seidler, R. D., Alberts, J. L., & Stelmach, G. E. (2002). Changes in Multi-Joint Performance  
785 With Age. *Motor Control*, (6), 19–21.
- 786 60. Seidler-Dobrin, R. D., & Stelmach, G. E. (1998). Persistence in visual feedback control by  
787 the elderly. *Experimental Brain Research*, 119(4), 467–474.
- 788 61. Shadmehr, R., & Mussa-Ivaldi, F. A. (1994). Adaptive representation of dynamics during  
789 learning of a motor task. *Journal of Neuroscience*, 14(5), 3208–3224.
- 790 62. Shadmehr, R., Smith, M. A., & Krakauer, J. W. (2010). Error Correction, Sensory  
791 Prediction, and Adaptation in Motor Control. *Annual Review of Neuroscience*, 33(1), 89–  
792 108.
- 793 63. Slack, J. R., Hopkins, W. G., & Williams, M. N. (1979). Nerve Sheaths and Motoneurone  
794 Collateral Sprouting. *Nature*, 282, 506–507.

- 795 64. Smith, J. L., Crawford, M., Proske, U., Taylor, J. L., & Gandevia, S. C. (2009). Signals of  
796 motor command bias joint position sense in the presence of feedback from  
797 proprioceptors. *Journal of Applied Physiology*, *106*(3), 950–958.
- 798 65. Sorock, G. S., & Labiner, D. M. (1992). Peripheral neuromuscular dysfunction and falls in  
799 an elderly cohort. *American Journal of Epidemiology*, *136*(5), 584–591.
- 800 66. Taylor, M. M., & Creelman, C. D. (1967). PEST: Efficient Estimates on Probability  
801 Functions. *The Journal of the Acoustical Society of America*, *41*(4), 782–787.
- 802 67. Trewartha, K. M., Garcia, A., Wolpert, D. M., & Flanagan, J. R. (2014). Fast But Fleeting:  
803 Adaptive Motor Learning Processes Associated with Aging and Cognitive Decline. *Journal*  
804 *of Neuroscience*, *34*(40), 13411–13421.
- 805 68. Valdez, G., Tapia, J. C., Kang, H., Clemenson, G. D., Gage, F. H., Lichtman, J. W., & Sanes,  
806 J. R. (2010). Attenuation of age-related changes in mouse neuromuscular synapses by  
807 caloric restriction and exercise. *Proceedings of the National Academy of Sciences*,  
808 *107*(33), 14863–14868.
- 809 69. van Beers, R. J., Sittig, A. C., & van der Gon, J. J. D. (1998). The precision of  
810 proprioceptive position sense. *Experimental Brain Research*, *122*(4), 367–377.
- 811 70. Vindras, P., Desmurget, M., Prablanc, C., & Viviani, P. (1998). Pointing Errors Reflect  
812 Biases in the Perception of the Initial Hand Position. *J Neurophysiol*, *79*(6), 3290–3294.

- 813 71. Wilson, E. T., Wong, J., & Gribble, P. L. (2010). Mapping proprioception across a 2D  
814 horizontal workspace. *PLoS One*, 5(7), e11851.
- 815 72. Wingert, J. R., Welder, C., & Foo, P. (2014). Age-Related Hip Proprioception Declines:  
816 Effects on Postural Sway and Dynamic Balance. *Archives of Physical Medicine and*  
817 *Rehabilitation*, 95(2), 253–261.
- 818 73. Wolpert, D. M., Ghahramani, Z., & Jordan, M. I. (1995). An internal model for  
819 sensorimotor integration. *Science*, 269(5232), 1880–1882.
- 820 74. Wong, J. D., Wilson, E. T., Kistemaker, D. A., & Gribble, P. L. (2014). Bimanual  
821 proprioception: are two hands better than one? *Journal of Neurophysiology*, 111(6),  
822 1362–1368.
- 823 75. Wright, M. L., Adamo, D. E., & Brown, S. H. (2011). Age-related declines in the detection  
824 of passive wrist movement. *Neuroscience Letters*, 500(2), 108–112.
- 825 76. Yan, J. H., Thomas, J. R., Stelmach, G. E., & Thomas, K. T. (2000). Developmental Features  
826 of Rapid Aiming Arm Movements Across the Lifespan. *Journal of Motor Behavior*, 32(2),  
827 121–140.
- 828 77. Yousif, N., Cole, J., Rothwell, J., & Diedrichsen, J. (2015). Proprioception in motor  
829 learning: lessons from a deafferented subject. *Experimental Brain Research*, 233(8),  
830 2449–2459.
- 831
